# Supplementary material
Source: PubMed Central journal article supplement (PMC4617784)
Supplement: NIHMS723486-supplement-2.pdf [file NIHMS723486-supplement-2.pdf]

**Supplemental Table 1. Echocardiographic Parameters****Fractional Shortening**

| Mean ± SD (%)          | 0D           | 5D           | 2W           | 6W           |
|------------------------|--------------|--------------|--------------|--------------|
| Coa-FGF2-500           | 36.39 ± 3.24 | 24.53 ± 2.98 | 24.68 ± 3.06 | 19.29 ± 3.53 |
| Free-FGF2/IL10-500/500 | 36.39 ± 3.24 | 26.43 ± 2.56 | 21.52 ± 3.69 | 20.37 ± 3.33 |
| Coa-FGF2/IL-10-500/100 | 36.39 ± 3.24 | 27.17 ± 2.44 | 26.83 ± 2.58 | 22.49 ± 3.58 |
| Coa-FGF2/IL-10-500/500 | 36.39 ± 3.24 | 30.13 ± 2.07 | 27.43 ± 2.63 | 24.10 ± 3.83 |
| Saline                 | 36.39 ± 3.24 | 29.36 ± 3.30 | 17.50 ± 4.25 | 16.33 ± 2.19 |

**Fractional Area Change**

| Mean ± SD (%)          | 0D           | 5D           | 2W           | 6W           |
|------------------------|--------------|--------------|--------------|--------------|
| Coa-FGF2-500           | 56.73 ± 4.87 | 45.86 ± 3.47 | 40.58 ± 3.02 | 33.16 ± 4.15 |
| Free-FGF2/IL10-500/500 | 56.73 ± 4.87 | 45.47 ± 2.75 | 32.66 ± 1.34 | 27.21 ± 3.60 |
| Coa-FGF2/IL-10-500/100 | 56.73 ± 4.87 | 47.76 ± 3.91 | 40.14 ± 3.10 | 32.85 ± 3.44 |
| Coa-FGF2/IL-10-500/500 | 56.73 ± 4.87 | 50.24 ± 3.80 | 43.23 ± 2.96 | 37.92 ± 3.11 |
| Saline                 | 56.73 ± 4.87 | 39.74 ± 3.80 | 29.74 ± 4.76 | 25.71 ± 4.19 |

**Ejection Fraction**

| Mean ± SD (%)          | 0D           | 5D           | 2W           | 6W           |
|------------------------|--------------|--------------|--------------|--------------|
| Coa-FGF2-500           | 72.51 ± 2.75 | 59.11 ± 3.51 | 55.20 ± 3.53 | 45.97 ± 5.26 |
| Free-FGF2/IL10-500/500 | 72.51 ± 2.75 | 59.88 ± 2.46 | 47.12 ± 3.40 | 41.97 ± 4.93 |
| Coa-FGF2/IL-10-500/100 | 72.51 ± 2.75 | 61.99 ± 2.56 | 56.18 ± 3.14 | 47.99 ± 2.81 |
| Coa-FGF2/IL-10-500/500 | 72.51 ± 2.75 | 65.20 ± 3.24 | 58.78 ± 2.93 | 52.86 ± 3.55 |
| Saline                 | 72.51 ± 2.75 | 57.47 ± 2.64 | 41.93 ± 6.15 | 37.83 ± 4.26 |

**End-Diastolic Area**

| Mean ± SD (mm <sup>2</sup> ) | 0D          | 5D           | 2W           | 6W           |
|------------------------------|-------------|--------------|--------------|--------------|
| Coa-FGF2-500                 | 9.51 ± 1.04 | 12.97 ± 1.36 | 14.98 ± 2.53 | 19.23 ± 1.62 |
| Free-FGF2/IL10-500/500       | 9.51 ± 1.04 | 13.22 ± 1.08 | 15.69 ± 1.15 | 21.44 ± 2.94 |
| Coa-FGF2/IL-10-500/100       | 9.51 ± 1.04 | 11.40 ± 1.29 | 14.34 ± 1.79 | 17.83 ± 2.01 |
| Coa-FGF2/IL-10-500/500       | 9.51 ± 1.04 | 10.87 ± 1.10 | 12.67 ± 1.32 | 16.18 ± 1.36 |
| Saline                       | 9.51 ± 1.04 | 12.51 ± 1.42 | 16.91 ± 2.38 | 21.28 ± 4.03 |

**End-Systolic Area**

| Mean ± SD (mm <sup>2</sup> ) | 0D          | 5D          | 2W           | 6W           |
|------------------------------|-------------|-------------|--------------|--------------|
| Coa-FGF2-500                 | 4.15 ± 0.86 | 7.04 ± 1.01 | 8.93 ± 1.72  | 12.89 ± 1.78 |
| Free-FGF2/IL10-500/500       | 4.15 ± 0.86 | 7.21 ± 0.70 | 10.55 ± 0.62 | 15.68 ± 2.86 |
| Coa-FGF2/IL-10-500/100       | 4.15 ± 0.86 | 5.97 ± 0.92 | 8.59 ± 1.22  | 11.97 ± 1.48 |
| Coa-FGF2/IL-10-500/500       | 4.15 ± 0.86 | 5.40 ± 0.59 | 7.19 ± 0.80  | 10.05 ± 1.08 |
| Saline                       | 4.15 ± 0.86 | 7.54 ± 1.06 | 11.89 ± 1.93 | 15.86 ± 3.40 |
